# Supplementary material for: ZEB1 induces ER-α promoter hypermethylation and confers antiestrogen resistance in breast cancer
Source: PubMed Central journal article supplement (PMC5477580; doi:10.1038/cddis.2017.154), 2017-04-06
Supplement: cddis2017154x1.pdf [file cddis2017154x1.pdf]

## Supplementary materials and methods

### Primers

|                                                    |                                                    |
|----------------------------------------------------|----------------------------------------------------|
| Construction of full-length ZEB1 expression vector |                                                    |
| forward                                            | 5'-ATGGCGGATGGCCGCC-3'                             |
| reverse                                            | 5'-TTAGGCTTCATTTGTCTTTTCTTCA-3'                    |
| Construction of shRNA vector                       |                                                    |
| shZEB1-1                                           | 5'-CGGCGCAATAACGTTACAAAT-3'                        |
| shZEB1-2                                           | 5'-GGCGCAATAACGTTACAAA-3'                          |
| shZEB1-3                                           | 5'-CCTCTCTGAAAGAACACATTA-3'                        |
| shDNMT3B-1                                         | 5'-GCCTCAAGACAAATTGCTA-3'                          |
| shDNMT3B-2                                         | 5'-GCTGTCCGAACTCGAAATAAC-3'                        |
| shDNMT3B-3                                         | 5'-GGTTTGGCGATGGCAAGTTCT-3'                        |
| shHDAC1-1                                          | 5'-GGAAAGTCTGTTACTACTA-3'                          |
| shHDAC1-2                                          | 5'-GCTCCATCCGTCCAGATAACA-3'                        |
| shHDAC1-3                                          | 5'-GCTGGCAAAGGCAAGTATTAT-3'                        |
| shER- $\alpha$ -1                                  | 5'-GGAGAATGTTGAAACACAAGC-3'                        |
| shER- $\alpha$ -2                                  | 5'-GGATTTGACCCTCCATGATCA-3'                        |
| shER- $\alpha$ -3                                  | 5'-GCATTCTACAGGCCAAATT-3'                          |
| Construction of ER- $\alpha$ promoter              |                                                    |
| ER-wtE <sub>2</sub> forward                        | 5'-CGGGGTACCATTATGGCTCCGTTGTTCG-3'                 |
| ER-wtE <sub>2</sub> reverse                        | 5'-CCGCTCGAGATGGAGGGCTGGCTGTAC-3'                  |
| Site-Directed Mutagenesis of ER- $\alpha$ promoter |                                                    |
| ER-mE <sub>2</sub> I forward                       | 5'-TGCTATAAAAACCAGCAT <u>TCT</u> GGGGCTGGACGCAG-3' |
| ER-mE <sub>2</sub> I reverse                       | 5'-CTGCGTCCAGCCCCAGATGCTGGTTTTTATAGCA-3'           |
| ER-mE <sub>2</sub> II forward                      | 5'-TGGCGGCGGGCA <u>TCT</u> GTAGTCCCAG-3'           |
| ER-mE <sub>2</sub> II reverse                      | 5'-CTGGGACTACAGATGCCCGCCGCCA-3'                    |
| Bisulfite sequencing PCR                           |                                                    |
| BSP forward                                        | TATTGAAAAGTGGATTATTGATGGAT                         |
| BSP reverse                                        | ATCACCCAAACTAAAATACAATAAC                          |
| Methylation specific PCR                           |                                                    |
| m-MSP forward                                      | AAAAATTAGTATTTGGGGTTGGAC                           |
| m-MSP reverse                                      | CCATATTAACCGAAATAATCTCGAT                          |
| u-MSP forward                                      | AAATTAGTATTTGGGGTTGGATGT                           |
| u-MSP reverse                                      | TTCACCATATTAACCAAATAATCTCA                         |
| Quantitative RT-PCR                                |                                                    |
| human ZEB1 forward                                 | 5'-CAGCTTGATACCTGTGAATGGG-3'                       |
| human ZEB1 reverse                                 | 5'-TATCTGTGGTCGTGTGGGACT-3'                        |
| human ER- $\alpha$ forward                         | 5'-ATGTGGCTAGTTTGTCTC-3'                           |
| human ER- $\alpha$ reverse                         | 5'-AGCAAGATTTCTCCAGGTC-3'                          |
| Quantitative ChIP                                  |                                                    |
| E <sub>2</sub> -box I forward                      | 5'-TATGGCTCCGTTGTTCG-3'                            |

|                                |                               |
|--------------------------------|-------------------------------|
| E <sub>2</sub> -box I reverse  | 5'-GGGATTACAGGCGTGAG-3'       |
| E <sub>2</sub> -box II forward | 5'-GGCACCTGTAGTCCCA-3'        |
| E <sub>2</sub> -box II reverse | 5'-CCATCTCGGCTCACTG-3'        |
| GAPDH forward                  | 5'-GGAGCGAGATCCCTCCAAAAT-3'   |
| GAPDH reverse                  | 5'-GGCTGTTGTCATACTTCTCATGG-3' |
| Gene-free forward              | 5'-ATGGTTATGTAGCCTTTGG-3'     |
| Gene-free reverse              | 5'-GAGGAATACGGTATGGAA-3'      |

### Antibodies

| Marker       | Species | Application | Manufacturer | Catalog No. | Dilution                       |
|--------------|---------|-------------|--------------|-------------|--------------------------------|
| anti-ZEB1    | Rabbit  | IHC         | Abcam        | ab87280     | 1:100                          |
|              | Rabbit  | IB          | Santa Cruz   | sc-25388    | 1:1000                         |
|              | Rabbit  | IP<br>CHIP  | Proteintech  | 221544-1-AP | 2 µg/reaction<br>1 µg/reaction |
| anti-ER-α    | Rabbit  | IHC         | CST          | #8644       | 1:100                          |
|              |         | IB          |              |             | 1:1000                         |
| anti-PR      | Rabbit  | IHC         | Abcam        | ab16661     | 1:100                          |
| anti-Ki67    | Rabbit  | IHC         | Abcam        | ab131492    | 1:1000                         |
| anti-DNMT3B  | Mouse   | IP          | Abcam        | ab13604     | 2 µg/reaction                  |
|              |         | CHIP        |              |             | 1 µg/reaction                  |
|              |         | IB          |              |             | 1:1000                         |
| anti-HDAC1   | Rabbit  | IP          | Abcam        | ab51846     | 2 µg/reaction                  |
|              |         | CHIP        |              |             | 1 µg/reaction                  |
|              |         | IB          |              |             | 1:1000                         |
| anti-β-actin | Mouse   | IB          | Sigma        | A-4700      | 1:5000                         |

IHC: Immunohistochemistry; IB: Immunoblotting; IF: Immunofluorescence; IP:

Immunoprecipitation; ChIP: Chromatin immunoprecipitation

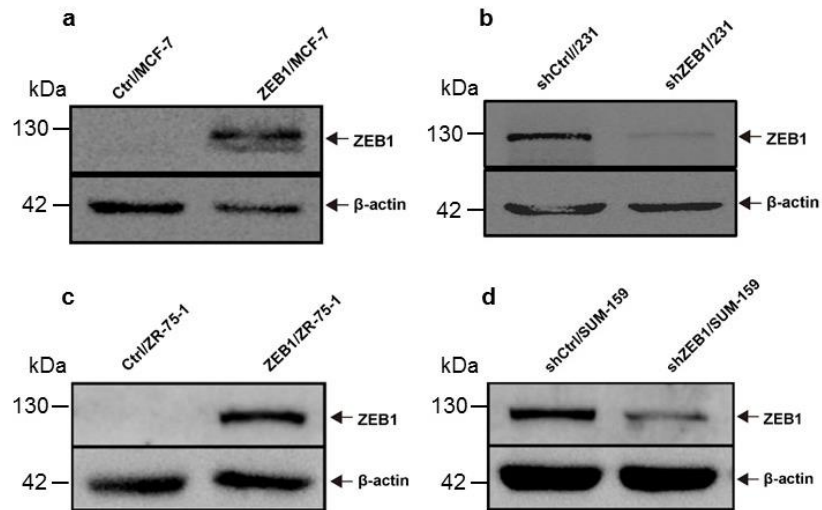

**Figure S1** Gain- or loss-of-function of ZEB1 in breast cancer cells. **(a,c)** MCF-7 **(a)** and ZR-75-1 **(c)** cells were stably transfected with the ZEB1 expression plasmid. The expression of ZEB1 was verified by immunoblotting and normalized to the levels of  $\beta$ -actin. **(b,d)** MDA-MB-231 **(b)** and SUM-159 **(d)** cells were stably transfected with the specific shRNA targeting ZEB1. The expression of ZEB1 was verified by immunoblotting and normalized to the levels of  $\beta$ -actin.

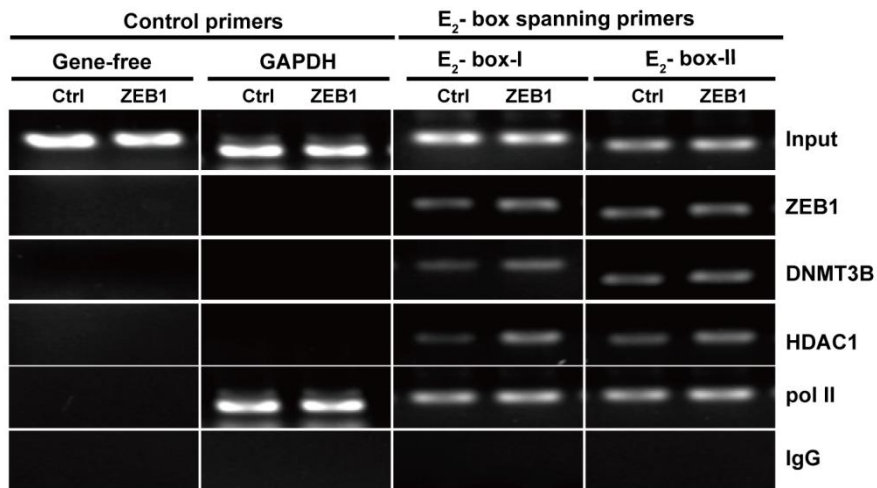

**Figure S2** ZEB1 recruits to the ER- $\alpha$  promoter in an E<sub>2</sub>-box dependent manner by forming a complex with HDCA1 and DNMT3B. The association of ZEB1, HDCA1, DNMT3B, and RNA polymerase II (Pol II) with the ER- $\alpha$  promoter was analyzed by ChIP assay. The amplified sequence of the ER- $\alpha$  promoter fragment containing E2-box I and E2-box II elements is shown. GAPDH and a “gene-free” fragment was used as positive and negative controls, respectively. Input DNA amounts were confirmed by equal loading of chromatin.

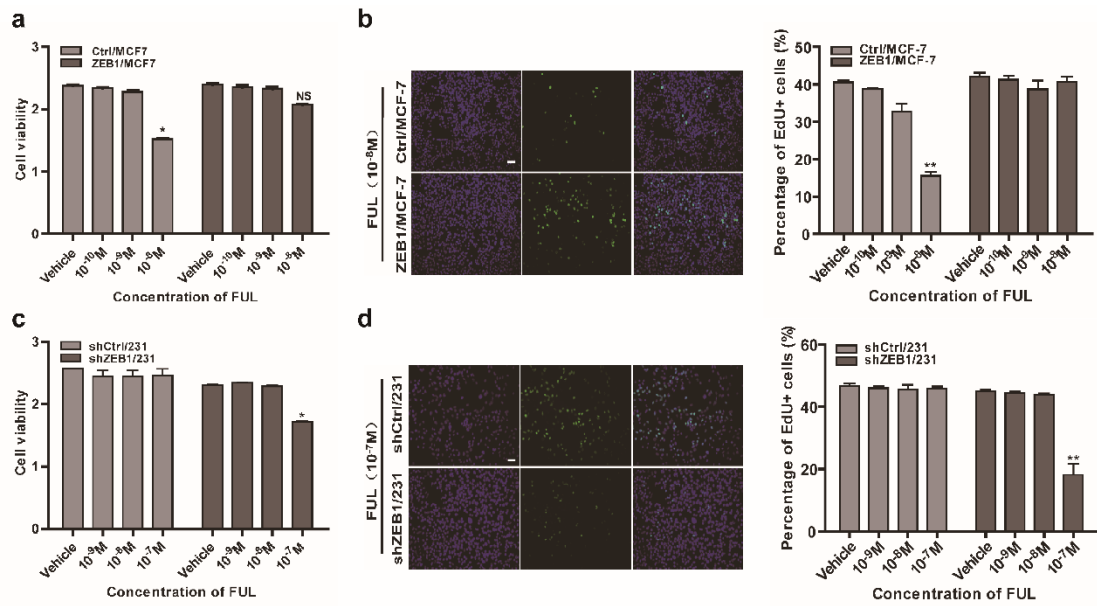

**Figure S3** Ectopic ZEB1 confers antiestrogen resistance in breast cancer cells. **(a and b)** ZEB1/MCF-7 and Ctrl/MCF-7 cells were treated with different concentrations of fulvestrant for 72 h. Cell growth inhibition was determined by cell viability **(a)** and EdU proliferation **(b)** assays. \* $P < 0.05$ , \*\* $P < 0.01$  vs. the respective control in one-way ANOVA followed by Tukey's honestly significant difference test. **(c and d)** shZEB1/231 and shCtrl/231 cells were treated with different concentrations of fulvestrant for 72 h. Cell growth inhibition was determined by cell viability **(c)** and EdU proliferation **(d)** assays. \* $P < 0.05$ , \*\* $P < 0.01$  vs. the respective control in one-way ANOVA followed by Tukey's honestly significant difference test.

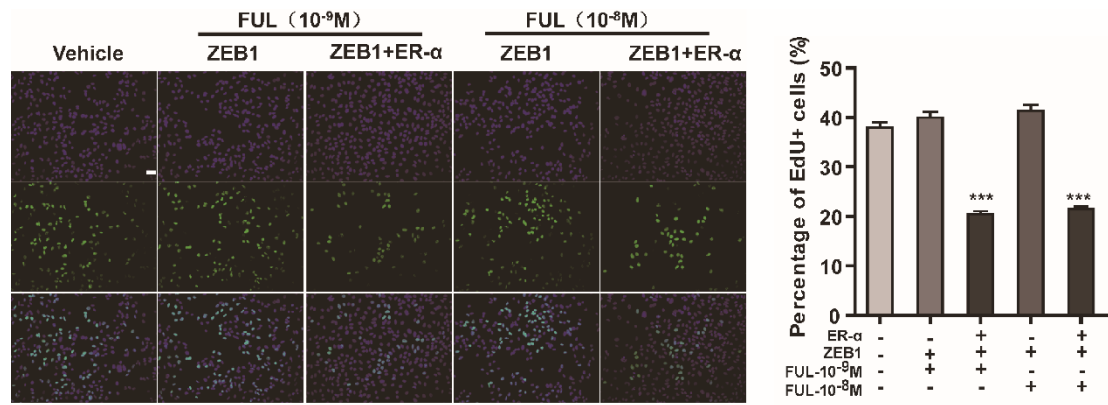

**Figure S4** ZEB1 induces antiestrogen resistance in an ER- $\alpha$ -dependent manner. An ER- $\alpha$  expression plasmid was transfected into ZEB1/MCF-7 cells, which were then treated with 10<sup>-8</sup> M and 10<sup>-9</sup> M fulvestrant for 72 h, respectively. Cell growth inhibition was determined by EdU proliferation assays. \*\*\* $P < 0.001$  vs. the respective control in one-way ANOVA followed by Tukey's honestly significant difference test.

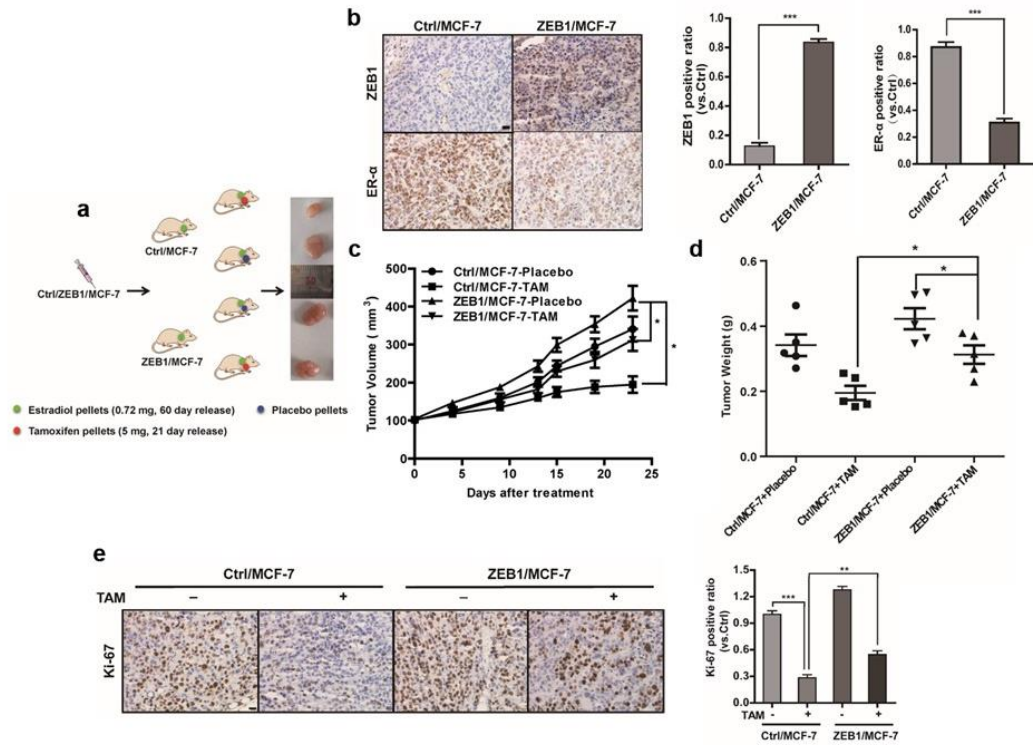

**Figure S5** Ectopic ZEB1 decreases antiestrogen sensitivity *in vivo* in a nude mouse xenograft model. **(a)** A total of  $1.5 \times 10^6$  Ctrl/MCF-7 or ZEB1/MCF-7 cells were injected into the mammary fat pads of nude mice. The tumors were allowed to grow 10 days in the presence of estradiol. The mice were then divided into two groups ( $n=5$ ) and treated with tamoxifen and placebo, respectively. **(b)** The expression of ZEB1 and ER- $\alpha$  in Ctrl/MCF-7 or ZEB1/MCF-7 xenograft tumors was examined by immunohistochemical staining.  $***P < 0.001$  vs. the respective control in Student's *t*-test. Scale bars, 20  $\mu\text{m}$ . **(c and d)** Approximate tumor volumes **(c)** and weights **(d)** were measured.  $*P < 0.05$  vs. the respective control in Student's *t*-test. **(e)** The expression of Ki-67 in tamoxifen- or placebo-treated xenograft tumors was examined by immunohistochemical staining.  $**P < 0.01$ ,  $***P < 0.001$  vs. the respective control in Student's *t*-test. Scale bars, 20  $\mu\text{m}$ .
